# Supplementary material for: Characterization of Komagataeibacter Isolate Reveals New Prospects on Waste Stream Valorization for Bacterial Cellulose Production
Source: Preprints.org preprint supplement (doi:10.20944/preprints202108.0312.v1), 2021-08-16
Supplement: Supplementary file 1 [file Supplementary Table.docx]

**Supplementary Table**

| **Table S1** General genome and assembly statistics of *K. rhaeticus* ENS9b genome | |
| --- | --- |
| Attribute | Value |
| N50 (shortest sequence length at 50% of the genome) | 200461 bp |
| L50 (smallest number of contigs comprising of 50% of the genome) | 6 |
| Contigs unplaced in the genome | 7 (90 kbp) |
| Bowtie2 mapping | 94% |
| Chromosome | 3645912 bp (GC content, 63.1%) |
| Origin of replication | At genomic position 1099952:1100308 bp |
| Number of protein-coding genes | 3302 |
| Number of repeat DNA | 120 |
| Number of rRNA | 3 |
| Number of tRNA | 46 |
| Number of gene annotations to KEGG orthology | 1646 |
| Predicted plasmids | 5 [p9b_1 (18826 bp, GC 59%), p9b_2 (13375 bp, GC 60%), p9b_3 (9758 bp, GC 60%), p9b_4 (3007 bp, GC 66%) and p9b_5 (2295 bp, GC 67%)] |
